# Supplementary material for: Enterovirus Infection, CXC Chemokine Ligand 10 (CXCL10), and CXCR3 Circuit
Source: Oxford University Press journal article supplement (doi:10.2337/db09-0091), 2009-07-29
Supplement: db09-0091_online_appendix.pdf [file db09-0091_online_appendix.pdf]

**Figure S1** Examination on specificity of primary antibodies used for immunohistochemical staining of paraffin-embedded human pancreas obtained from patients with fulminant type 1 diabetes. Sections stained with monoclonal antibodies for CD8, CXCR3, VP1, macrophages (CD68), MHC class II, MHC class I, CXCL10, interferon (IFN)-gamma and dendritic cells (CD11c) (left) compared to concentration matched isotype immunoglobulins, normal goat serum, normal rabbit IgG or without primary antibodies (right) (staining for CD8, CXCR3, CD68 and CD11c:  $\times 200$ , others:  $\times 400$ ).

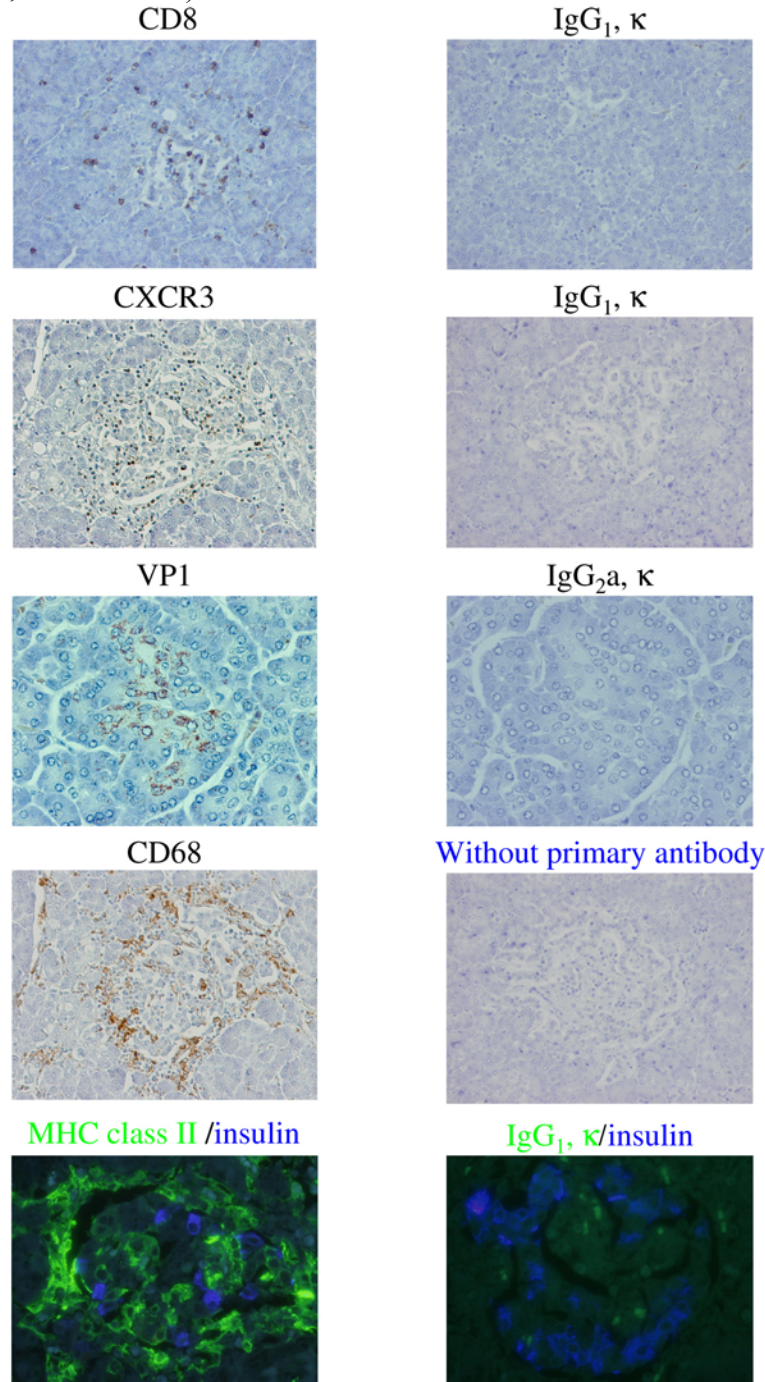

Figure S1

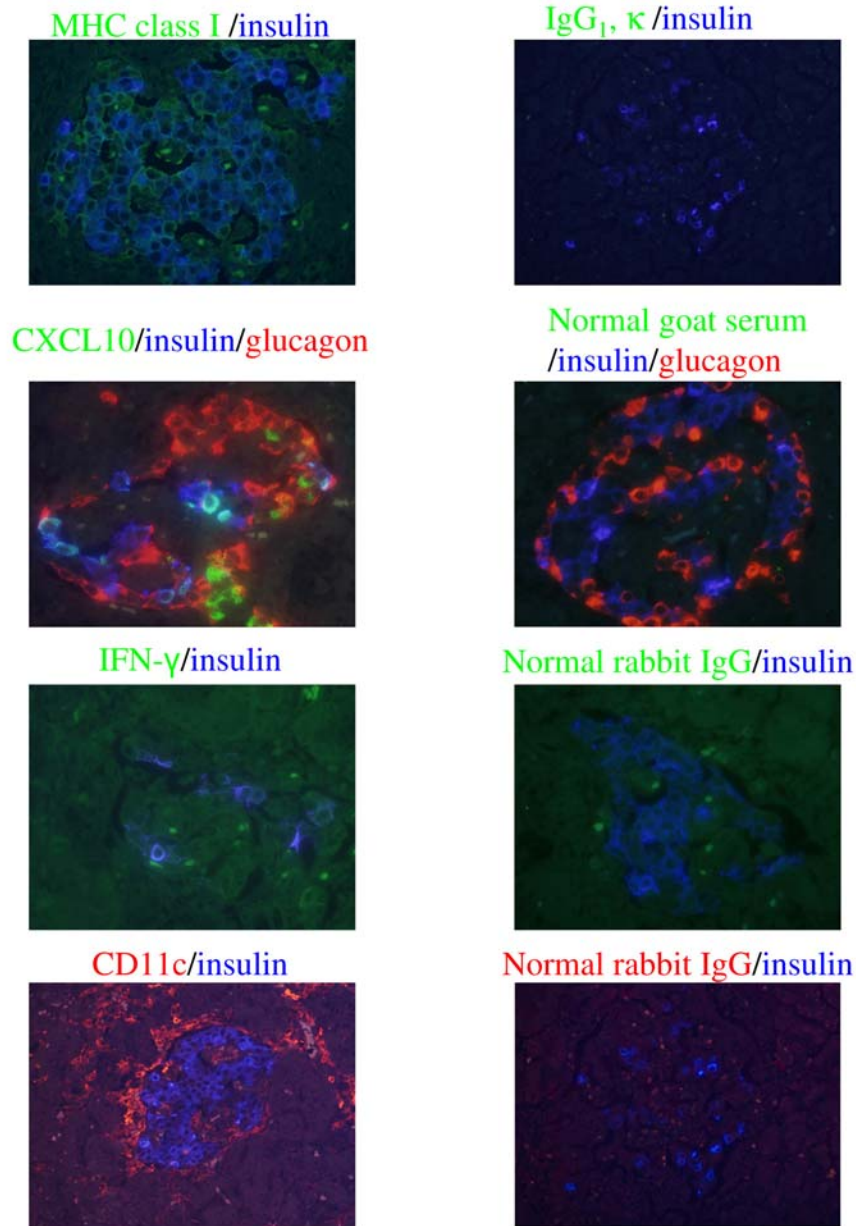

Figure S1(continued)

**Figure S2** Hematoxylin and eosin (HE) staining (a), staining for VP1 (b), triple immunostaining for CXCL10, interferon (IFN)-gamma and insulin (c) of the pancreas of the patient with active pancreatitis ( $\times 200$ ). No cells showing positive results for VP1, CXCL10 or IFN-gamma were observed.

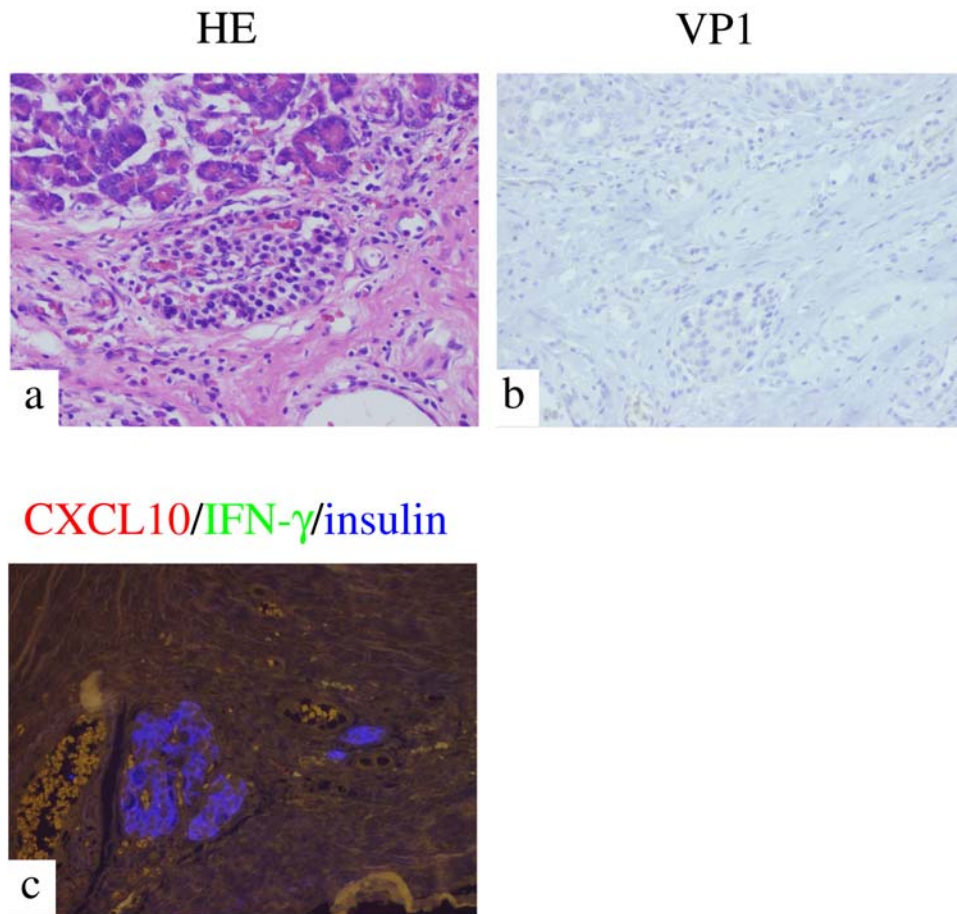

Figure S2

**Figure S3** Some VP-1-positive acinar cells (a, brown) were surrounded by macrophages (b, brown) ( $\times 200$ , serial section, Case 2).

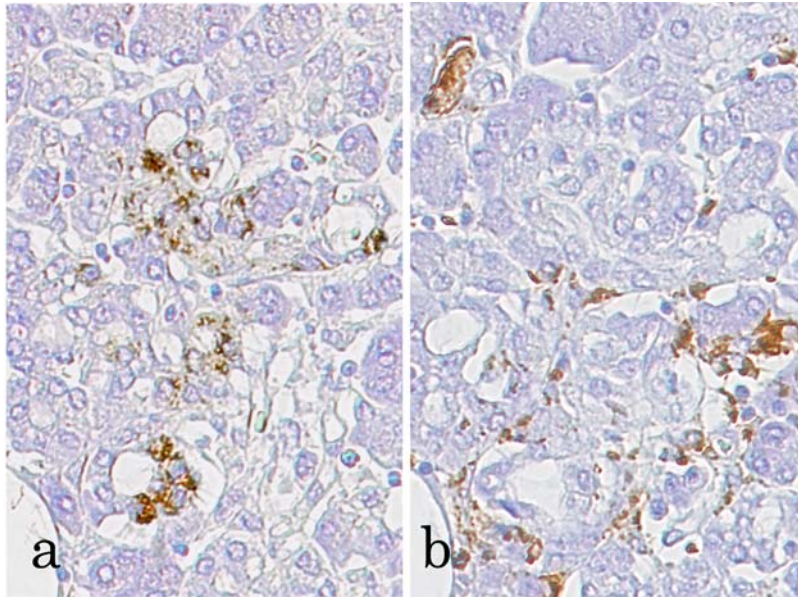

**Figure S3**



**Figure S4** No CXCL10 expression is shown in a section from a non-diabetic control pancreas. a) CXCL10; b) insulin; c) glucagon; d) merged ( $\times 400$ ).

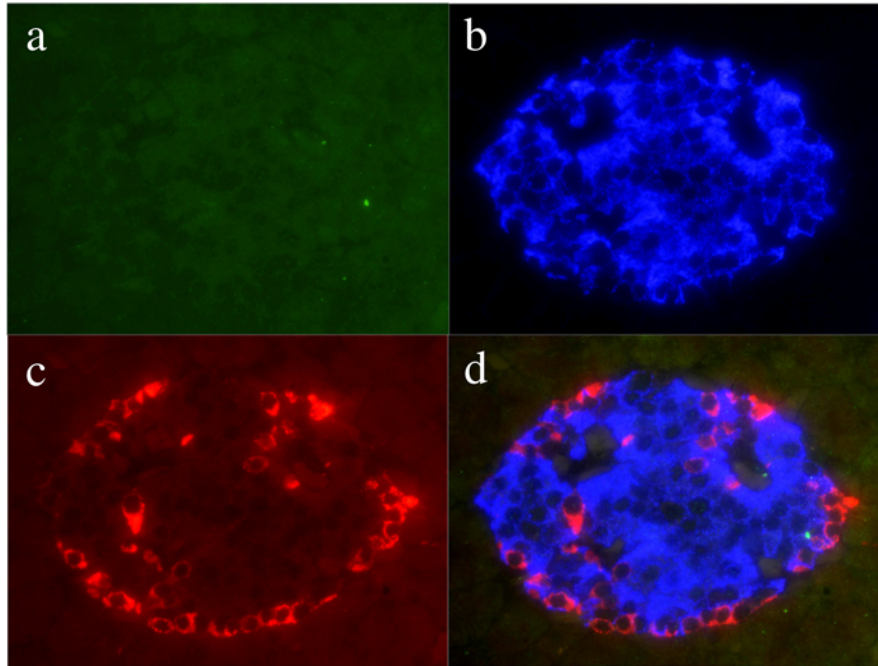

Figure S4

**Figure S5** Immunohistochemical staining of the pancreas from a patient with slowly progressive type1 diabetes. a) CD8+ T cell (brown) infiltration in islets (arrows) and around the islets ( $\times 200$ ). b) The volume of beta-cells (brown) was decreased (serial sections with a). No expression of CXCL10 was observed (c) in beta-cells (d) and alpha-cells (e). (f): Merged image of (c), (d) and (e) ( $\times 400$ ).

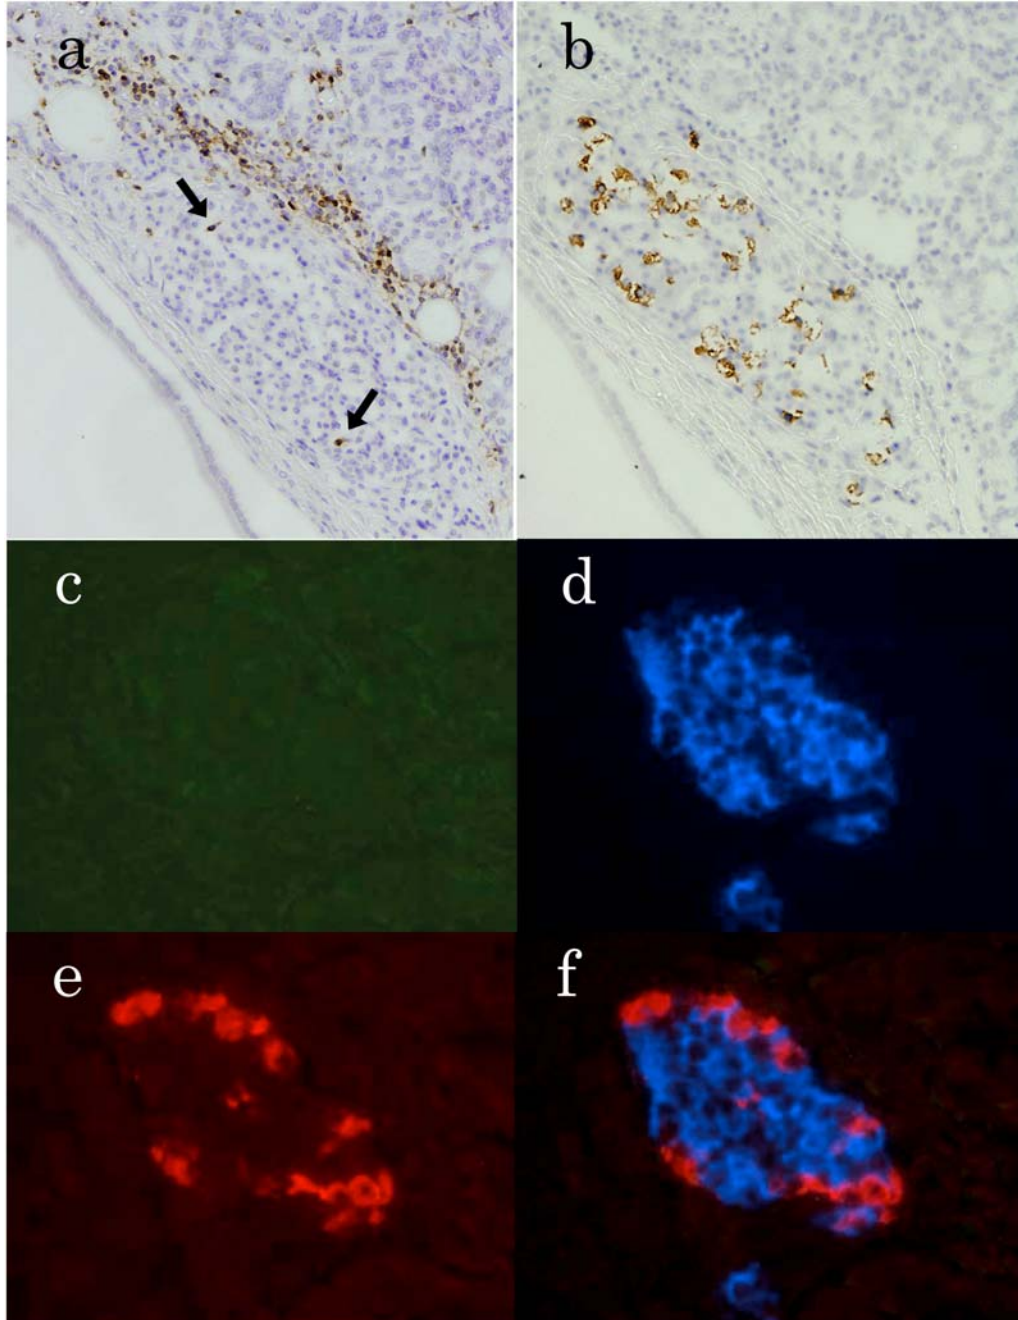

Figure S5
